# Supplementary material for: Gimatecan regulates the death receptor signaling by autophagic lysosomal homeostasis and promotes cardia cancer cell death
Source: Research Square preprint supplement (doi:10.21203/rs.3.rs-3667887/v1), 2023-12-06

**Supplementary material:** compared with the topology for stand, Iraq, Gimatecan gradient dilution of cardia cancer cells after 48 hours, through CCK8 value-added ability tests, we found that the gimatecan effect is the most apparent inhibition of cell proliferation ability.


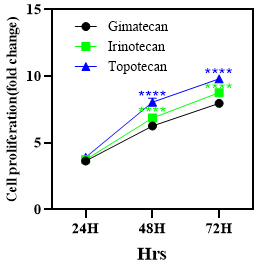

Supplement: Supplementary file 1 [file 598b16d250732961b17cf341.docx]
